# Supplementary material for: Genome-Wide Profiling of a Prognostic RNA-Binding Protein Signature in Esophageal Cancer
Source: Research Square preprint supplement (doi:10.21203/rs.3.rs-1439005/v1), 2022-03-15
Supplement: Supplementary file 1 [file 49fa220074430808e8895031.docx]

## Supplementary Figure

**Supplementary figure 1.** Our proposed model was compared with two existing RBP-related models. (A) Prognostic model 1; (B) prognostic model 2; (C) our proposed model.

## Supplementary Tables

**Supplementary Table 1.** Differentially expressed RBP-related genes

**Supplementary Table 2.** KEGG pathway enrichment analysis of the DEGs

**Supplementary Table 3.** RBP genes identified by KEGG pathway enrichment analysis

**Supplementary Table 4.** DEGs obtained from cluster analysis
**Supplementary Table 5.** Identified hub genes
